# Supplementary material
Source: publisher figshare collection journal article supplement (https://gsapubs.figshare.com/ndownloader/files/39640039)
Supplement: Supplementary file 1 [file 39640039]

## Sheet: Table 3
Table S3 Representative electron microprobe analyses of low-sodic clinopyroxene in eclogite samples
sample.no	LH3-4						LH3-2
mineral	Cpx3	Cpx3	Cpx3	Cpx4	Cpx4	Cpx4	Cpx4	Cpx4	Cpx4
SiO2	53.148	53.426	53.384	53.71	51.631	53.748	53.189	52.473	52.365
TiO2	0.144	0.089	0.041	0.046	0.09	0.033	0.03	0.024	0.022
Al2O3	5.916	5.973	4.403	1.909	2.802	1.462	2.175	3.479	3.831
Cr2O3	0.013	0.045	-	0	0.045	0.012	0.014	-	0.033
FeO	8.841	8.718	9.84	9.786	17.347	9.969	13.29	12.266	11.07
MnO	0.102	0.149	0.141	0.135	0.216	0.167	0.261	0.293	0.252
MgO	12.372	12.406	12.708	13.028	13.759	13.725	15.19	14.236	14.072
CaO	17.342	17.928	19.078	20.372	13.898	20.946	16.166	17.153	17.912
Na2O	1.726	1.844	0.997	0.808	0.3	0.538	0.268	0.54	0.503
K2O	-	0.001	-	0	0.007	0.019	0.008	0.002	-
Oxygens	6	6	6	6	6	6	6	6	6
Si	1.95439	1.96461	1.96307	1.97506	1.89861	1.97645	1.9559	1.92957	1.9256
Ti	0.0039837	0.00246215	0.00113425	0.00127257	0.00248981	0.000912931	0.000829938	0.00066395	0.000608621
Al	0.256394	0.258865	0.190822	0.0827344	0.121436	0.0633618	0.0942627	0.150777	0.166032
Cr	0.000377957	0.00130831	0	0	0.00130831	0.000348884	0.000407031	0	0.00095943
Fe3+	0	0	0	0	0	0	0	0	0
Fe2+	0.27189	0.26592	0.302336	0.30463	0.548168	0.30867	0.412029	0.380486	0.343516
Mn	0.00317695	0.00464084	0.00439167	0.00420479	0.00672766	0.00520148	0.00812926	0.00912595	0.00784894
Mg	0.678223	0.680087	0.696642	0.714184	0.754257	0.752393	0.832704	0.780406	0.771416
Ca	0.683273	0.706362	0.751671	0.802655	0.54758	0.82527	0.636939	0.675827	0.705731
Na	0.123059	0.130399	0.0710181	0.058312	0.0219781	0.0386193	0.0192627	0.0388337	0.0361865
K	0	4.65291e-05	0	0	0.000337426	0.000897404	0.000378342	9.46361e-05	0
SUM	3.97477	4.01689	3.98136	3.93937	3.8882	3.97004	3.95752	3.96252	3.95482
Wo	0.418317	0.427484	0.429367	0.440663	0.295988	0.4375	0.338496	0.367953	0.387623
En	0.415225	0.411583	0.397934	0.392093	0.407706	0.398865	0.442534	0.424892	0.423701
Fs	0.166458	0.160932	0.172699	0.167244	0.296306	0.163635	0.21897	0.207155	0.188676
